# Supplementary material for: Serum Uric Acid Predicts All-Cause and Cardiovascular Mortality Independently of Hypertriglyceridemia in Cardiometabolic Patients without Established CV Disease: A Sub-Analysis of the URic acid Right for heArt Health (URRAH) Study
Source: MDPI journal article supplement (doi:10.3390/metabo13020244), 2023-02-07
Supplement: s1 [file s1]

## SUPPLEMENTARY TABLES AND SUPPLEMENTARY FIGURE

### **Serum uric acid predicts all-cause and cardiovascular mortality independently of hypertriglyceridemia in cardiometabolic patients without established CV disease: a sub-analysis of the URic acid Right for heArt Health (URRAH) study**

Alessandro Mengozzi <sup>1,2,3\*</sup>, Nicola Riccardo Pugliese <sup>1\*</sup>, Stefano Masi <sup>1</sup>, Fabio Angeli <sup>4</sup>, Carlo M. Barbagallo <sup>5</sup>, Michele Bombelli <sup>6</sup>, Federica Cappelli <sup>1</sup>, Edoardo Casiglia <sup>7</sup>, Rosario Cianci <sup>8</sup>, Michele Ciccarelli <sup>9</sup>, Arrigo F.G. Cicero <sup>10,11</sup>, Massimo Cirillo <sup>12</sup>, Pietro Cirillo <sup>13</sup>, Raffaella Dell'Oro <sup>6</sup>, Lanfranco D'Elia <sup>14</sup>, Giovambattista Desideri <sup>15</sup>, Claudio Ferri <sup>15</sup>, Ferruccio Galletti <sup>14</sup>, Loreto Gesualdo <sup>13</sup>, Cristina Giannattasio <sup>16,17</sup>, Guido Grassi <sup>6</sup>, Guido Iaccarino <sup>9</sup>, Luciano Lippa <sup>18</sup>, Francesca Mallamaci <sup>19</sup>, Alessandro Maloberti <sup>16,17</sup>, Maria Masulli <sup>14</sup>, Alberto Mazza <sup>20</sup>, Maria Lorenza Muiesan <sup>21</sup>, Pietro Nazzaro <sup>22</sup>, Paolo Palatini <sup>7</sup>, Gianfranco Parati <sup>23</sup>, Roberto Pontremoli <sup>24</sup>, Fosca Quarti-Trevano <sup>6</sup>, Marcello Rattazzi <sup>25</sup>, Gianpaolo Reboldi <sup>26</sup>, Giulia Rivasi <sup>27</sup>, Elisa Russo <sup>24</sup>, Massimo Salvetti <sup>21</sup>, Valerie Tikhonoff <sup>28</sup>, Giuliano Tocci <sup>29</sup>, Andrea Ungar <sup>27</sup>, Paolo Verdecchia <sup>30</sup>, Francesca Viazzi <sup>24</sup>, Massimo Volpe <sup>29</sup>, Claudio Borghi <sup>10,11\*</sup>, Agostino Virdis <sup>1\*</sup> on behalf of the Working Group on Uric Acid and Cardiovascular Risk of the Italian Society of Hypertension (SIIA)

<sup>1</sup> Department of Clinical and Experimental Medicine, University of Pisa, Italy

<sup>2</sup> Center for Translational and Experimental Cardiology (CTEC), Department of Cardiology, University Hospital Zurich, University of Zurich, Switzerland.

<sup>3</sup> Scuola Superiore Sant'Anna, Pisa, Italy

<sup>4</sup> Department of Medicine and Surgery. University of Insubria, Varese, and Department of Medicine and Cardiopulmonary Rehabilitation. Maugeri Care and Research Institutes, IRCCS Tradate, Varese, Italy

<sup>5</sup> Biomedical Department of Internal Medicine and Specialistics, University of Palermo, Palermo, Italy

<sup>6</sup> Clinica Medica, Department of Medicine and Surgery, University of Milano-Bicocca, Monza, Italy

<sup>7</sup> Studium Patavinum, Department of Medicine, University of Padua, Padua, Italy

<sup>8</sup> Department of Translational and Precision Medicine, Sapienza University of Rome, Rome

<sup>9</sup> Department of Advanced Biomedical Sciences, "Federico II" University of Naples, Naples, Italy

<sup>10</sup> Department Hypertension and Cardiovascular Disease Research Center, Medical and Surgical Sciences Dept., Alma Mater Studiorum University of Bologna, Bologna, Italy

<sup>11</sup> Heart-Chest-Vascular Dept., IRCCS AOU of Bologna, Bologna, Italy

- <sup>12</sup> Department of Public Health, “Federico II” University of Naples, Naples, Italy
- <sup>13</sup> Nephrology, Dialysis and Transplantation Unit, Department of Emergency and Organ Transplantation, “Aldo Moro” University of Bari, Bari, Italy
- <sup>14</sup> Department of Clinical Medicine and Surgery, ‘Federico II’ University of Naples, Naples, Italy
- <sup>15</sup> Department of Life, Health and Environmental Sciences, University of L’Aquila, L’Aquila, Italy
- <sup>16</sup> Cardiology IV, “A.De Gasperi’s” Department, Niguarda Ca’ Granda Hospital, Milan, Italy
- <sup>17</sup> School of Medicine and Surgery, Milano-Bicocca University, Milan, Italy
- <sup>18</sup> Italian Society of General Medicine (SIMG), Avezzano, L’Aquila, Italy
- <sup>19</sup> CNR-IFC, Clinical Epidemiology of Renal Diseases and Hypertension, Reggio Cal Unit, Reggio Calabria, Italy
- <sup>20</sup> Department of Internal Medicine, Santa Maria Della Misericordia General Hospital, AULSS 5 Polesana, Rovigo, Italy
- <sup>21</sup> Department of Clinical and Experimental Sciences, University of Brescia, Italy
- <sup>22</sup> Department of Precision and Regenerative Medicine and Ionic Area (DiMePre-J), Neurosciences and Sense Organs, University of Bari Medical School, Bari, Italy
- <sup>23</sup> S. Luca Hospital, Istituto Auxologico Italiano & University of Milan-Bicocca, Milan, Italy
- <sup>24</sup> Department of Internal Medicine, University of Genoa; IRCSS Ospedale Policlinico San Martino, Genova, Italy
- <sup>25</sup> Department of Medicine - DIMED, University of Padova, Medicina Interna 1°, Ca’ Foncello University Hospital, Treviso, Italy
- <sup>26</sup> Department of Medical and Surgical Science, University of Perugia, Perugia, Italy
- <sup>27</sup> Department of Geriatric and Intensive Care Medicine, Careggi Hospital and University of Florence, Italy
- <sup>28</sup> Department of Medicine, University of Padua, Padua, Italy
- <sup>29</sup> Department of Clinical and Molecular Medicine, University of Rome Sapienza, Rome, Italy
- <sup>30</sup> Hospital S. Maria della Misericordia, Perugia, Italy

\* Alessandro Mengozzi and Nicola Riccardo Pugliese joint first authorship.

Claudio Borghi and Agostino Virdis joint last authorship.

**Corresponding author:**

Alessandro Mengozzi, MD

Department of Clinical and Experimental Medicine, University of Pisa, Italy

Via Savi 10

Email: [alessandro.mengozzi@medmcs.unipi.it](mailto:alessandro.mengozzi@medmcs.unipi.it)

Fax +39 050 995728

Tel +39 050 992558

**Supplementary Table S1.** Exploration of all-cause mortality across the cardiometabolic spectrum for SUA $\geq$ 4.7 mg/dL.

| All-cause mortality                      |     |        |                            |                            |
|------------------------------------------|-----|--------|----------------------------|----------------------------|
|                                          |     |        | Univariable                | Multivariable              |
| Healthy (n=1956)                         |     |        |                            |                            |
|                                          | hTG | n=231  | 2.35 [0.91-6.08], p=0.079  | 2.35 [0.84-6.55], p=0.102  |
|                                          | nTG | n=1725 | 1.99 [1.47-2.69], p<0.001  | 1.55 [1.09-2.21], p<0.015  |
| Obese (n=148)                            |     |        |                            |                            |
|                                          | hTG | n=40   | >100 [0.00->100], p=0.999  | >100 [0.00->100], p=0.979  |
|                                          | nTG | n=108  | 3.98 [1.16-13.69], p=0.028 | 5.79 [1.20-27.98], p=0.029 |
| Hypertensive (n=4227)                    |     |        |                            |                            |
|                                          | hTG | n=961  | 1.41 [1.01-1.96], p=0.043  | 0.96 [0.67-1.38], p=0.840  |
|                                          | nTG | n=3266 | 1.70 [1.45-1.98], p<0.001  | 1.28 [1.09-1.52], p=0.002  |
| Diabetic (n=75)                          |     |        |                            |                            |
|                                          | hTG | n=19   | 1.53 [0.41-5.68], p=0.523  | 2 [1.06->100]; p<0.001     |
|                                          | nTG | n=56   | 1.66 [0.81-3.37], p=0.164  | 1.21 [0.49-3.00], p=0.677  |
| Obese and hypertensive (n=919)           |     |        |                            |                            |
|                                          | hTG | n=317  | 1.93 [0.83-4.47], p=0.126  | 1.31 [0.55-3.13], p=0.536  |
|                                          | nTG | n=602  | 1.13 [0.75-1.71], p=0.564  | 0.86 [0.55-1.35], p=0.520  |
| Obese and diabetic (n=18)                |     |        |                            |                            |
|                                          | hTG | n=9    | n/a                        | n/a                        |
|                                          | nTG | n=9    | n/a                        | n/a                        |
| Hypertensive and diabetic (n=524)        |     |        |                            |                            |
|                                          | hTG | n=178  | 1.63 [0.98-2.69], p=0.058  | 1.13 [0.65-1.98], p=0.669  |
|                                          | nTG | n=346  | 1.66 [1.19-2.32], p=0.003  | 1.36 [0.96-2.01], p=0.082  |
| Obese, hypertensive and diabetic (n=257) |     |        |                            |                            |
|                                          | hTG | n=110  | 2.70 [0.97-7.53], p=0.057  | 2.70 [0.91-7.98], p=0.072  |
|                                          | nTG | n=147  | 1.19 [0.68-2.08], p=0.533  | 1.28 [0.67-2.46], p=0.452  |

Hazard ratios [95% confidence interval] for SUA cut-off across TG strata in univariable and multivariable analysis for all-cause mortality across the cardiometabolic spectrum. Age, sex, BMI, the active consumption of alcohol, the current smoking habit, SBP, DBP, total cholesterol, HDL, glycaemia, creatinine, hematocrit and diuretics were used as confounders. Data were analysed by Cox regression analysis. The analysis was not performed on people with obesity and type diabetes and no other comorbidities due to the small sample size of the group (n=18, n=9 for nTG and hTG subgroups). Data are reported for completeness in undersized groups (n<50). p <0.05 was considered statistically significant >100: hazard ratio or confidence interval value higher than 100. nTG: normotriglyceridemia. hTG: hypertriglyceridemia. SUA: serum uric acid.

**Supplementary Table S2.** Exploration of cardiovascular mortality across the cardiometabolic spectrum for SUA $\geq$ 5.6 mg/dL.

| Cardiovascular mortality                 |     |        |                            |                            |
|------------------------------------------|-----|--------|----------------------------|----------------------------|
|                                          |     |        | Univariable                | Multivariable              |
| Healthy (n=1956)                         |     |        |                            |                            |
|                                          | hTG | n=231  | 1.56 [0.45-5.39], p=0.482  | 3.80 [0.76-19.10], p=0.105 |
|                                          | nTG | n=1725 | 1.89 [1.14-3.16], p=0.014  | 1.46 [0.83-2.68], p=0.188  |
| Obese (n=148)                            |     |        |                            |                            |
|                                          | hTG | n=40   | >100 [0.00->100], p=0.999  | 50.94 [0.00->100], p=1.000 |
|                                          | nTG | n=108  | 4.52 [1.08-18.98], p=0.039 | 5.08 [0.78-43.83], p=0.085 |
| Hypertensive (n=4227)                    |     |        |                            |                            |
|                                          | hTG | n=961  | 1.57 [1.07-2.31], p=0.021  | 1.19 [0.77-1.84], p=0.442  |
|                                          | nTG | n=3266 | 1.90 [1.53-2.37], p<0.001  | 1.37 [1.08-1.74], p=0.010  |
| Diabetic (n=75)                          |     |        |                            |                            |
|                                          | hTG | n=19   | 2.32 [0.49-10.91], p=0.286 | 0.00 [0->100], p=0.993     |
|                                          | nTG | n=56   | 3.82 [1.46-10.05], p=0.007 | 6.92 [1.50-31.91], p=0.013 |
| Obese and hypertensive (n=919)           |     |        |                            |                            |
|                                          | hTG | n=313  | 2.01 [0.85-4.76], p=0.112  | 1.50 [0.58-3.93], p=0.404  |
|                                          | nTG | n=602  | 2.08 [1.19-3.62], p=0.010  | 1.86 [1.00-3.45], p=0.051  |
| Obese and diabetic (n=18)                |     |        |                            |                            |
|                                          | hTG | n=9    | n/a                        | n/a                        |
|                                          | nTG | n=9    | n/a                        | n/a                        |
| Hypertensive and diabetic (n=524)        |     |        |                            |                            |
|                                          | hTG | n=178  | 1.76 [1.00-3.12], p=0.051  | 1.39 [0.75-2.59], p=0.298  |
|                                          | nTG | n=346  | 1.92 [1.29-2.95], p=0.002  | 1.60 [1.02-2.53], p=0.043  |
| Obese, hypertensive and diabetic (n=257) |     |        |                            |                            |
|                                          | hTG | n=110  | 1.45 [0.66-3.19], p=0.360  | 1.46 [0.58-3.68], p=0.426  |
|                                          | nTG | n=147  | 1.00 [0.53-1.90], p=0.989  | 1.12 [0.55-2.58], p=0.752  |

Hazard ratios [95% confidence interval] for SUA cut-off across TG strata in univariable and multivariable analysis for cardiovascular and mortality across the cardiometabolic spectrum. Age, sex, BMI, Age, sex, BMI, the active consumption of alcohol, the current smoking habit, SBP, DBP, total cholesterol, HDL, glycaemia, creatinine, hematocrit and diuretics were used as confounders. Data were analysed by Cox regression analysis. The analysis was not performed on people with obesity and type diabetes and no other comorbidities due to the small sample size of the group (n=18, n=9 for nTG and hTG subgroups). Data are reported for completeness in undersized groups (n<50). p <0.05 was considered statistically significant >100: hazard ratio or confidence interval value higher than 100. nTG: normotriglyceridemia. hTG: hypertriglyceridemia. SUA: serum uric acid.

**Supplementary Table S3.** Exploration of all-cause mortality across the cardiometabolic spectrum of combined SUA and TG strata adopting  $\text{SUA} \geq 4.7$  mg/dL and  $\text{TG} \geq 150$  mg/dL as cut-offs.

| All-cause mortality                      |          |        |                                |                                |
|------------------------------------------|----------|--------|--------------------------------|--------------------------------|
|                                          |          |        | Univariable                    | Multivariable                  |
| Healthy (n=1956)                         |          |        |                                |                                |
|                                          | ISUA_nTG | n=985  | 1 (reference)                  | 1 (reference)                  |
|                                          | hSUA_nTG | n=740  | 1.99 [1.47-2.69], $p < 0.001$  | 1.55 [1.10-2.18], $p = 0.012$  |
|                                          | ISUA_hTG | n=74   | 0.96 [0.39-2.37], $p = 0.926$  | 0.60 [0.23-1.53], $p = 0.281$  |
|                                          | hSUA_hTG | n=157  | 2.36 [1.53-2.69], $p < 0.001$  | 1.71 [1.05-2.81], $p = 0.033$  |
| Obese (n=148)                            |          |        |                                |                                |
|                                          | ISUA_nTG | n=42   | 1 (reference)                  | 1 (reference)                  |
|                                          | hSUA_nTG | n=66   | 3.90 [1.14-13.41], $p = 0.031$ | 5.64 [1.24-25.59], $p = 0.025$ |
|                                          | ISUA_hTG | n=7    | 0.00 [0.00->100], $p = 0.997$  | 0.00 [0.00->100], $p = 0.998$  |
|                                          | hSUA_hTG | n=33   | 2.36 [0.59-9.43], $p = 0.225$  | 6.29 [0.98-40.29], $p = 0.052$ |
| Hypertensive (n=4227)                    |          |        |                                |                                |
|                                          | ISUA_nTG | n=1486 | 1 (reference)                  | 1 (reference)                  |
|                                          | hSUA_nTG | n=1780 | 1.69 [1.45-1.98], $p < 0.001$  | 1.25 [1.06-1.47], $p = 0.009$  |
|                                          | ISUA_hTG | n=237  | 1.07 [0.78-1.47], $p = 0.682$  | 1.45 [1.04-2.03], $p = 0.029$  |
|                                          | hSUA_hTG | n=724  | 1.52 [1.25-1.84], $p < 0.001$  | 1.61 [1.29-2.01], $p < 0.001$  |
| Diabetic (n=75)                          |          |        |                                |                                |
|                                          | ISUA_nTG | n=25   | 1 (reference)                  | 1 (reference)                  |
|                                          | hSUA_nTG | n=31   | 1.64 [0.81-3.34], $p = 0.171$  | 1.33 [0.56-3.15], $p = 0.521$  |
|                                          | ISUA_hTG | n=5    | 1.14 [0.32-4.03], $p = 0.844$  | 2.34 [0.50-10.91], $p = 0.278$ |
|                                          | hSUA_hTG | n=14   | 1.92 [0.80-4.60], $p = 0.141$  | 1.66 [0.54-5.10], $p = 0.375$  |
| Obese and hypertensive (n=919)           |          |        |                                |                                |
|                                          | ISUA_nTG | n=182  | 1 (reference)                  | 1 (reference)                  |
|                                          | hSUA_nTG | n=420  | 1.13 [0.74-1.71], $p = 0.571$  | 0.95 [0.61-1.47], $p = 0.810$  |
|                                          | ISUA_hTG | n=261  | 0.69 [0.29-1.66], $p = 0.409$  | 0.99 [0.40-2.44], $p = 0.981$  |
|                                          | hSUA_hTG | n=56   | 1.35 [0.87-2.09], $p = 0.179$  | 1.27 [0.77-2.12], $p = 0.352$  |
| Obese and diabetic (n=18)                |          |        |                                |                                |
|                                          | ISUA_nTG | n=3    | 1 (reference)                  | 1 (reference)                  |
|                                          | hSUA_nTG | n=6    | n/a                            | n/a                            |
|                                          | ISUA_hTG | n=5    | n/a                            | n/a                            |
|                                          | hSUA_hTG | n=4    | n/a                            | n/a                            |
| Hypertensive and diabetic (n=524)        |          |        |                                |                                |
|                                          | ISUA_nTG | n=137  | 1 (reference)                  | 1 (reference)                  |
|                                          | hSUA_nTG | n=209  | 1.66 [1.19-2.32], $p = 0.003$  | 1.40 [0.98-2.00], $p = 0.065$  |
|                                          | ISUA_hTG | n=56   | 1.05 [0.63-1.77], $p = 0.843$  | 1.43 [0.82-2.50], $p = 0.210$  |
|                                          | hSUA_hTG | n=122  | 1.72 [1.19-2.48], $p = 0.004$  | 1.83 [1.19-2.82], $p = 0.006$  |
| Obese, hypertensive and diabetic (n=257) |          |        |                                |                                |
|                                          | ISUA_nTG | n=42   | 1 (reference)                  | 1 (reference)                  |
|                                          | hSUA_nTG | n=105  | 1.19 [0.68-2.08], $p = 0.537$  | 1.05 [0.58-1.90], $p = 0.874$  |
|                                          | ISUA_hTG | n=19   | 0.52 [0.17-1.54], $p = 0.234$  | 0.35 [0.11-1.11], $p = 0.075$  |
|                                          | hSUA_hTG | n=91   | 1.46 [0.83-2.56], $p = 0.188$  | 1.19 [0.63-2.20], $p = 0.613$  |

Hazard ratios [95% confidence interval] for SUA and TG cut-offs in univariable and multivariable analysis for all-cause mortality across the cardiometabolic spectrum. Age, sex, BMI, the active consumption of alcohol, the current smoking habit, SBP, DBP, total cholesterol, HDL, glycaemia, creatinine, hematocrit and diuretics were used as confounders. Data were analysed by Cox regression analysis. The analysis was not performed on people with obesity and type diabetes and no other comorbidities due to the small sample size of the group (n=18). Data are reported for completeness in undersized groups (n<50).  $p < 0.05$  was considered statistically significant  $>100$ : hazard ratio or confidence interval value higher than 100. *lSUA\_hTG*: low SUA and hypertriglyceridemia TG. *lSUA\_nTG*: low SUA and normotriglyceridemia. *hSUA\_hTG*: high SUA and hypertriglyceridemia TG. *hSUA\_nTG*: high SUA and normotriglyceridemia. TG: triglycerides. SUA: serum uric acid

**Supplementary Table S4.** Exploration of cardiovascular mortality across the cardiometabolic spectrum of combined SUA and TG strata adopting SUA $\geq$ 5.6 mg/dL and TG $\geq$ 150 mg/dL as cut-offs.

| Cardiovascular mortality                 |          |        |                            |                            |
|------------------------------------------|----------|--------|----------------------------|----------------------------|
|                                          |          |        | Univariable                | Multivariable              |
| Healthy (n=1956)                         |          |        |                            |                            |
|                                          | LSUA_nTG | n=1410 | 1 (reference)              | 1 (reference)              |
|                                          | hSUA_nTG | n=315  | 1.90 [1.14-3.16], p=0.014  | 1.48 [0.85-2.59], p=0.167  |
|                                          | LSUA_hTG | n=144  | 0.99 [0.40-2.49], p=0.988  | 0.79 [0.30-2.13], p=0.648  |
|                                          | hSUA_hTG | n=87   | 1.57 [0.63-3.94], p=0.336  | 0.93 [0.34-2.58], p=0.890  |
| Obese (n=148)                            |          |        |                            |                            |
|                                          | LSUA_nTG | n=77   | 1 (reference)              | 1 (reference)              |
|                                          | hSUA_nTG | n=31   | 4.48 [1.07-18.79], p=0.040 | 3.67 [0.70-19.29], p=0.124 |
|                                          | LSUA_hTG | n=17   | 0.00 [0.00->100], p=0.998  | 0.00 [0.00->100], p=0.999  |
|                                          | hSUA_hTG | n=23   | 1.99 [0.33-11.94], p=0.450 | 2.70 [0.27-27.26], p=0.399 |
| Hypertensive (n=4227)                    |          |        |                            |                            |
|                                          | LSUA_nTG | n=2354 | 1 (reference)              | 1 (reference)              |
|                                          | hSUA_nTG | n=912  | 1.90 [1.53-2.37], p<0.001  | 1.35 [1.07-1.71], p=0.012  |
|                                          | LSUA_hTG | n=501  | 1.06 [0.77-1.46], p=0.721  | 1.29 [0.91-1.82], p=0.154  |
|                                          | hSUA_hTG | n=460  | 1.67 [1.25-2.23], p<0.001  | 1.62 [1.17-2.25], p=0.004  |
| Diabetic (n=75)                          |          |        |                            |                            |
|                                          | LSUA_nTG | n=35   | 1 (reference)              | 1 (reference)              |
|                                          | hSUA_nTG | n=21   | 3.67 [1.41-9.59], p=0.008  | 4.36 [1.20-15.80], p=0.025 |
|                                          | LSUA_hTG | n=11   | 1.48 [0.38-5.73], p=0.569  | 14.05 [1.94->100], p=0.009 |
|                                          | hSUA_hTG | n=8    | 4.83 [1.35-17.22], p=0.015 | 4.10 [0.76-22-16], p=0.101 |
| Obese and hypertensive (n=919)           |          |        |                            |                            |
|                                          | LSUA_nTG | n=335  | 1 (reference)              | 1 (reference)              |
|                                          | hSUA_nTG | n=247  | 2.07 [1.19-3.60], p=0.010  | 1.96 [1.09-3.53], p=0.025  |
|                                          | LSUA_hTG | n=128  | 0.93 [0.40-2.18], p=0.870  | 1.58 [0.64-3.89], p=0.318  |
|                                          | hSUA_hTG | n=189  | 1.88 [1.02-3.44], p=0.042  | 2.45 [1.17-5.10], p=0.017  |
| Obese and diabetic (n=18)                |          |        |                            |                            |
|                                          | LSUA_nTG | n=4    | 1 (reference)              | 1 (reference)              |
|                                          | hSUA_nTG | n=5    | n/a                        | n/a                        |
|                                          | LSUA_hTG | n=6    | n/a                        | n/a                        |
|                                          | hSUA_hTG | n=3    | n/a                        | n/a                        |
| Hypertensive and diabetic (n=524)        |          |        |                            |                            |
|                                          | LSUA_nTG | n=223  | 1 (reference)              | 1 (reference)              |
|                                          | hSUA_nTG | n=123  | 1.94 [1.28-2.94], p=0.002  | 1.65 [1.07-2.57], p=0.025  |
|                                          | LSUA_hTG | n=56   | 1.07 [0.63-1.80], p=0.812  | 1.31 [0.74-2.33], p=0.359  |
|                                          | hSUA_hTG | n=122  | 1.87 [1.18-2.96], p=0.008  | 1.78 [1.04-3.05], p=0.034  |
| Obese, hypertensive and diabetic (n=257) |          |        |                            |                            |
|                                          | LSUA_nTG | n=82   | 1 (reference)              | 1 (reference)              |
|                                          | hSUA_nTG | n=65   | 1.00 [0.53-1.90], p=0.993  | 0.98 [0.50-1.94], p=0.955  |
|                                          | LSUA_hTG | n=47   | 0.82 [0.39-1.74], p=0.606  | 0.72 [0.32-1.63], p=0.435  |
|                                          | hSUA_hTG | n=63   | 1.16 [0.61-2.23], p=0.652  | 1.11 [0.53-2.32], p=0.783  |

Hazard ratios [95% confidence interval] for SUA and TG cut-offs in univariable and multivariable analysis for cardiovascular mortality across the cardiometabolic spectrum. Age, sex, BMI, the active consumption of alcohol, the current smoking habit, SBP, DBP, total cholesterol, HDL, glycaemia, creatinine, hematocrit and diuretics were used as confounders. Data were analysed by Cox regression analysis. The analysis was not performed on people with obesity and type diabetes and no other comorbidities due to the small sample size of the group (n=18). Data are reported for completeness in undersized groups (n<50).  $p < 0.05$  was considered statistically significant  $>100$ : hazard ratio or confidence interval value higher than 100. *lSUA\_hTG*: low SUA and hypertriglyceridemia TG. *lSUA\_nTG*: low SUA and normotriglyceridemia. *hSUA\_hTG*: high SUA and hypertriglyceridemia TG. *hSUA\_nTG*: high SUA and normotriglyceridemia. TG: triglycerides. SUA: serum uric acid.



**Supplementary Table S5.** Exploration of all-cause mortality across the cardiometabolic spectrum for SUA/serum creatinine>5.35.

| All-cause mortality                      |     |        |                           |                              |
|------------------------------------------|-----|--------|---------------------------|------------------------------|
|                                          |     |        | Univariable               | Multivariable                |
| Healthy (n=1956)                         |     |        |                           |                              |
|                                          | hTG | n=231  | 2.08 [0.90-4.80], p=0.086 | 2.50 [1.02-6.14], p=0.045    |
|                                          | nTG | n=1725 | 1.19 [0.89-1.60], p=0.239 | 1.23 [0.90-1.67], p=0.189    |
| Obese (n=148)                            |     |        |                           |                              |
|                                          | hTG | n=40   | >100 [0.00->100], p=0.999 | >100 [0.00->100], p=0.998    |
|                                          | nTG | n=108  | 1.58 [0.62-4.03], p=0.334 | 4.24 [1.22-14.74], p=0.023   |
| Hypertensive (n=4227)                    |     |        |                           |                              |
|                                          | hTG | n=961  | 1.07 [0.81-1.42], p=0.614 | 0.89 [0.67-1.19], p=0.443    |
|                                          | nTG | n=3266 | 1.40 [1.21-1.62], p<0.001 | 1.23 [1.06-1.44], p=0.006    |
| Diabetic (n=75)                          |     |        |                           |                              |
|                                          | hTG | n=19   | 1.78 [0.53-5.94], p=0.348 | 10.92 [0.12-999.26], p=0.300 |
|                                          | nTG | n=56   | 1.30 [0.65-2.62], p=0.462 | 1.03 [0.39-2.70], p=0.958    |
| Obese and hypertensive (n=919)           |     |        |                           |                              |
|                                          | hTG | n=317  | 0.93 [0.53-1.64], p=0.170 | 1.80 [1.01-3.21], p=0.046    |
|                                          | nTG | n=602  | 1.79 [1.14-2.82], p=0.012 | 1.31 [0.82-2.08], p=0.252    |
| Obese and diabetic (n=18)                |     |        |                           |                              |
|                                          | hTG | n=9    | n/a                       | n/a                          |
|                                          | nTG | n=9    | n/a                       | n/a                          |
| Hypertensive and diabetic (n=524)        |     |        |                           |                              |
|                                          | hTG | n=178  | 1.02 [0.66-1.57], p=0.922 | 1.06 [0.65-1.71], p=0.829    |
|                                          | nTG | n=346  | 1.11 [0.81-1.51], p=0.530 | 1.08 [0.77-1.51], p=0.665    |
| Obese, hypertensive and diabetic (n=257) |     |        |                           |                              |
|                                          | hTG | n=110  | 1.11 [0.58-2.09], p=0.756 | 1.16 [0.59-2.30], p=0.667    |
|                                          | nTG | n=147  | 1.34 [0.79-2.26], p=0.281 | 1.67 [0.92-3.04], p=0.093    |

Hazard ratios [95% confidence interval] for SUA/serum creatinine cut-off across TG strata in univariable and multivariable analysis for all-cause mortality across the cardiometabolic spectrum. Age, sex, BMI, the active consumption of alcohol, the current smoking habit, SBP, DBP, total cholesterol, HDL, glycaemia, hematocrit and diuretics were used as confounders. Data were analysed by Cox regression analysis. The analysis was not performed on people with obesity and type diabetes and no other comorbidities due to the small sample size of the group (n=18, n=9 for nTG and hTG subgroups). Data are reported for completeness in undersized groups (n<50). p <0.05 was considered statistically significant >100: hazard ratio or confidence interval value higher than 100. nTG: normotriglyceridemia. hTG: hypertriglyceridemia. SUA: serum uric acid.

**Supplementary Table S6.** Exploration of cardiovascular mortality across the cardiometabolic spectrum for SUA/serum creatinine>5.35.

| Cardiovascular mortality                 |     |        |                            |                              |
|------------------------------------------|-----|--------|----------------------------|------------------------------|
|                                          |     |        | Univariable                | Multivariable                |
| Healthy (n=1956)                         |     |        |                            |                              |
|                                          | hTG | n=231  | 4.99 [0.63-39.44], p=0.811 | 10.48 [1.10-99.60], p=0.041  |
|                                          | nTG | n=1725 | 1.29 [0.81-2.07], p=0.285  | 1.41 [0.85-2.33], p=0.183    |
| Obese (n=148)                            |     |        |                            |                              |
|                                          | hTG | n=40   | >100 [0.00->100], p=0.999  | >100 [0.00->100], p=0.979    |
|                                          | nTG | n=108  | 2.58 [0.52-12.81], p=0.246 | 16.23 [1.03-256.66], p=0.048 |
| Hypertensive (n=4227)                    |     |        |                            |                              |
|                                          | hTG | n=961  | 1.05 [0.71-1.56], p=0.791  | 0.83 [0.55-1.26], p=0.389    |
|                                          | nTG | n=3266 | 1.40 [1.13-1.74], p=0.002  | 1.19 [0.95-1.48], p=0.122    |
| Diabetic (n=75)                          |     |        |                            |                              |
|                                          | hTG | n=19   | 1.19 [0.26-5.35], p=0.822  | >100 [0->100], p=0.999       |
|                                          | nTG | n=56   | 1.12 [0.44-2.85], p=0.815  | 0.62 [0.14-2.67], p=0.520    |
| Obese and hypertensive (n=919)           |     |        |                            |                              |
|                                          | hTG | n=317  | 1.10 [0.45-2.74], p=0.830  | 1.09 [0.43-2.79], p=0.849    |
|                                          | nTG | n=602  | 1.84 [0.94-3.59], p=0.073  | 1.20 [0.60-2.40], p=0.607    |
| Obese and diabetic (n=18)                |     |        |                            |                              |
|                                          | hTG | n=9    | n/a                        | n/a                          |
|                                          | nTG | n=9    | n/a                        | n/a                          |
| Hypertensive and diabetic (n=524)        |     |        |                            |                              |
|                                          | hTG | n=178  | 1.19 [0.67-2.12], p=0.544  | 1.25 [0.64-2.42], p=0.512    |
|                                          | nTG | n=346  | 1.24 [0.82-1.88], p=0.314  | 1.18 [0.75-1.84], p=0.477    |
| Obese, hypertensive and diabetic (n=257) |     |        |                            |                              |
|                                          | hTG | n=110  | 0.93 [0.40-2.14], p=0.861  | 1.14 [0.44-2.93], p=0.794    |
|                                          | nTG | n=147  | 1.43 [0.72-2.84], p=0.307  | 2.45 [1.08-5.57], p=0.032    |

Hazard ratios [95% confidence interval] for SUA/serum creatinine cut-off across TG strata in univariable and multivariable analysis for cardiovascular mortality across the cardiometabolic spectrum. Age, sex, BMI, the active consumption of alcohol, the current smoking habit, SBP, DBP, total cholesterol, HDL, glycaemia, hematocrit and diuretics were used as confounders. Data were analysed by Cox regression analysis. The analysis was not performed on people with obesity and type diabetes and no other comorbidities due to the small sample size of the group (n=18, n=9 for nTG and hTG subgroups). Data are reported for completeness in undersized groups (n<50). p <0.05 was considered statistically significant >100: hazard ratio or confidence interval value higher than 100. nTG: normotriglyceridemia. hTG: hypertriglyceridemia. SUA: serum uric acid.

**Supplementary Table S7.** Exploration of all-cause mortality across the cardiometabolic spectrum for combined SUA and TG strata adopting SUA/serum creatinine>5.35 and TG≥150 mg/dL as cut-offs.

| All-cause mortality                      |              |        |                           |                            |
|------------------------------------------|--------------|--------|---------------------------|----------------------------|
|                                          |              |        | Univariable               | Multivariable              |
| Healthy (n=1956)                         |              |        |                           |                            |
|                                          | ISUA/sCR_nTG | n=863  | 1 (reference)             | 1 (reference)              |
|                                          | hSUA/sCR_nTG | n=862  | 1.19 [0.89-1.60], p=0.238 | 1.20 [0.89-1.63], p=0.232  |
|                                          | ISUA/sCR_hTG | n=151  | 0.85 [0.39-1.84], p=0.681 | 0.60 [0.27-1.33], p=0.206  |
|                                          | hSUA/sCR_hTG | n=80   | 1.85 [1.19-2.86], p=0.006 | 1.43 [0.89-2.30], p=0.137  |
| Obese (n=148)                            |              |        |                           |                            |
|                                          | ISUA/sCR_nTG | n=44   | 1 (reference)             | 1 (reference)              |
|                                          | hSUA/sCR_nTG | n=64   | 1.58 [0.62-4.01], p=0.338 | 3.07 [1.00-9.44], p=0.051  |
|                                          | ISUA/sCR_hTG | n=12   | 0.00 [0.00->100], p=0.997 | 0.00 [0.00->100], p=0.998  |
|                                          | hSUA/sCR_hTG | n=28   | 1.44 [0.49-4.30], p=0.509 | 2.87 [0.77-10.73], p=0.117 |
| Hypertensive (n=4227)                    |              |        |                           |                            |
|                                          | ISUA/sCR_nTG | n=1639 | 1 (reference)             | 1 (reference)              |
|                                          | hSUA/sCR_nTG | n=1627 | 1.40 [1.20-1.62], p<0.001 | 1.22 [1.05-1.42], p=0.009  |
|                                          | ISUA/sCR_hTG | n=369  | 1.15 [0.90-1.47], p=0.254 | 1.61 [1.24-2.10], p<0.001  |
|                                          | hSUA/sCR_hTG | n=592  | 1.25 [1.02-1.53], p=0.032 | 1.52 [1.23-1.90], p<0.001  |
| Diabetic (n=75)                          |              |        |                           |                            |
|                                          | ISUA/sCR_nTG | n=25   | 1 (reference)             | 1 (reference)              |
|                                          | hSUA/sCR_nTG | n=31   | 1.29 [0.64-2.60], p=0.476 | 1.15 [0.46-2.88], p=0.772  |
|                                          | ISUA/sCR_hTG | n=7    | 0.98 [0.32-3.02], p=0.977 | 1.84 [0.43-7.91], p=0.410  |
|                                          | hSUA/sCR_hTG | n=12   | 1.84 [0.76-4.48], p=0.179 | 1.91 [0.66-5.48], p=0.231  |
| Obese and hypertensive (n=919)           |              |        |                           |                            |
|                                          | ISUA/sCR_nTG | n=191  | 1 (reference)             | 1 (reference)              |
|                                          | hSUA/sCR_nTG | n=411  | 1.80 [1.14-2.83], p=0.011 | 1.38 [0.87-2.18], p=0.172  |
|                                          | ISUA/sCR_hTG | n=78   | 1.83 [0.97-3.45], p=0.061 | 1.89 [0.98-3.67], p=0.059  |
|                                          | hSUA/sCR_hTG | n=239  | 1.71 [1.05-2.80], p=0.032 | 1.81 [1.06-3.08], p=0.029  |
| Obese and diabetic (n=18)                |              |        |                           |                            |
|                                          | ISUA/sCR_nTG | n=3    | 1 (reference)             | 1 (reference)              |
|                                          | hSUA/sCR_nTG | n=6    | n/a                       | n/a                        |
|                                          | ISUA/sCR_hTG | n=2    | n/a                       | n/a                        |
|                                          | hSUA/sCR_hTG | n=7    | n/a                       | n/a                        |
| Hypertensive and diabetic (n=524)        |              |        |                           |                            |
|                                          | ISUA/sCR_nTG | n=159  | 1 (reference)             | 1 (reference)              |
|                                          | hSUA/sCR_nTG | n=187  | 1.11 [0.81-1.52], p=0.521 | 1.12 [0.80-1.56], p=0.511  |
|                                          | ISUA/sCR_hTG | n=77   | 1.14 [0.77-1.71], p=0.514 | 1.51 [0.97-2.35], p=0.069  |
|                                          | hSUA/sCR_hTG | n=101  | 1.16 [0.81-1.68], p=0.412 | 1.58 [1.03-2.43], p=0.035  |
| Obese, hypertensive and diabetic (n=257) |              |        |                           |                            |
|                                          | ISUA/sCR_nTG | n=54   | 1 (reference)             | 1 (reference)              |
|                                          | hSUA/sCR_nTG | n=93   | 1.33 [0.79-2.24], p=0.290 | 1.44 [0.83-2.49], p=0.190  |
|                                          | ISUA/sCR_hTG | n=31   | 1.20 [0.60-2.40], p=0.600 | 1.00 [0.49-2.07], p=0.993  |
|                                          | hSUA/sCR_hTG | n=79   | 1.39 [0.81-2.40], p=0.232 | 1.31 [0.73-2.35], p=0.357  |

Hazard ratios [95% confidence interval] for SUA/serum creatinine and TG cut-offs in univariable and multivariable analysis for all-cause mortality across the cardiometabolic spectrum. Age, sex, BMI, the active consumption of alcohol, the current smoking habit, SBP, DBP, total cholesterol, HDL, glycaemia, hematocrit and diuretics were used as confounders. Data were analysed by Cox regression analysis. The analysis was not performed on people with obesity and type diabetes and no other comorbidities due to the small sample size of the group (n=18). Data are reported for completeness in undersized groups (n<50).  $p < 0.05$  was considered statistically significant  $>100$ : hazard ratio or confidence interval value higher than 100. *lSUA/sCr\_hTG*: low SUA/serum creatinine and hypertriglyceridemia TG. *lSUA/sCr\_nTG*: low SUA/serum creatinine and normotriglyceridemia. *hSUA/sCr\_hTG*: high SUA/serum creatinine and hypertriglyceridemia TG. *hSUA/sCr\_nTG*: high SUA/serum creatinine and normotriglyceridemia. TG: triglycerides. SUA: serum uric acid.

**Supplementary Table S8.** Exploration of cardiovascular mortality across the cardiometabolic spectrum of combined SUA and TG strata adopting SUA/serum creatinine>5.35 and TG≥150 mg/dL as cut-offs.

| All-cause mortality                      |              |        |                            |                            |
|------------------------------------------|--------------|--------|----------------------------|----------------------------|
|                                          |              |        | Univariable                | Multivariable              |
| Healthy (n=1956)                         |              |        |                            |                            |
|                                          | ISUA/sCR_nTG | n=863  | 1 (reference)              | 1 (reference)              |
|                                          | hSUA/sCR_nTG | n=862  | 1.29 [0.81-2.07], p=0.284  | 1.37 [0.84-2.24], p=0.210  |
|                                          | ISUA/sCR_hTG | n=151  | 0.33 [0.04-2.40], p=0.273  | 0.22 [0.03-1.65], p=0.140  |
|                                          | hSUA/sCR_hTG | n=80   | 1.67 [0.80-3.49], p=0.173  | 1.34 [0.59-3.04], p=0.486  |
| Obese (n=148)                            |              |        |                            |                            |
|                                          | ISUA/sCR_nTG | n=44   | 1 (reference)              | 1 (reference)              |
|                                          | hSUA/sCR_nTG | n=64   | 2.58 [0.52-12.81], p=0.245 | 7.59 [0.88-65.10], p=0.065 |
|                                          | ISUA/sCR_hTG | n=12   | 0.00 [0.00->100], p=0.998  | 0.00 [0.00->100], p=0.999  |
|                                          | hSUA/sCR_hTG | n=28   | 1.63 [0.23-11.60], p=0.624 | 4.05 [0.29-56.84], p=0.299 |
| Hypertensive (n=4227)                    |              |        |                            |                            |
|                                          | ISUA/sCR_nTG | n=1639 | 1 (reference)              | 1 (reference)              |
|                                          | hSUA/sCR_nTG | n=1627 | 1.40 [1.13-1.73], p=0.002  | 1.18 [0.94-1.46], p=0.148  |
|                                          | ISUA/sCR_hTG | n=369  | 1.23 [0.87-1.75], p=0.241  | 1.53 [1.05-2.24], p=0.027  |
|                                          | hSUA/sCR_hTG | n=592  | 1.67 [0.80-3.49], p=0.173  | 1.41 [1.03-1.92], p=0.032  |
| Diabetic (n=75)                          |              |        |                            |                            |
|                                          | ISUA/sCR_nTG | n=25   | 1 (reference)              | 1 (reference)              |
|                                          | hSUA/sCR_nTG | n=31   | 1.09 [0.43-2.77], p=0.860  | 0.72 [0.19-2.80], p=0.638  |
|                                          | ISUA/sCR_hTG | n=7    | 1.20 [0.32-4.51], p=0.792  | 4.95 [0.68-36.15], p=0.115 |
|                                          | hSUA/sCR_hTG | n=12   | 1.62 [0.48-5.45], p=0.438  | 1.48 [0.32-6.84], p=0.619  |
| Obese and hypertensive (n=919)           |              |        |                            |                            |
|                                          | ISUA/sCR_nTG | n=191  | 1 (reference)              | 1 (reference)              |
|                                          | hSUA/sCR_nTG | n=411  | 1.84 [0.94-3.58], p=0.075  | 1.29 [0.65-2.55], p=0.460  |
|                                          | ISUA/sCR_hTG | n=78   | 1.50 [0.56-4.07], p=0.421  | 1.83 [0.65-5.20], p=0.254  |
|                                          | hSUA/sCR_hTG | n=239  | 1.67 [0.81-3.47], p=0.167  | 2.19 [0.98-4.85], p=0.055  |
| Obese and diabetic (n=18)                |              |        |                            |                            |
|                                          | ISUA/sCR_nTG | n=3    | 1 (reference)              | 1 (reference)              |
|                                          | hSUA/sCR_nTG | n=6    | n/a                        | n/a                        |
|                                          | ISUA/sCR_hTG | n=2    | n/a                        | n/a                        |
|                                          | hSUA/sCR_hTG | n=7    | n/a                        | n/a                        |
| Hypertensive and diabetic (n=524)        |              |        |                            |                            |
|                                          | ISUA/sCR_nTG | n=159  | 1 (reference)              | 1 (reference)              |
|                                          | hSUA/sCR_nTG | n=187  | 1.24 [0.82-1.88], p=0.314  | 1.22 [0.78-1.89], p=0.379  |
|                                          | ISUA/sCR_hTG | n=77   | 1.12 [0.65-1.95], p=0.679  | 1.33 [0.72-2.43], p=0.362  |
|                                          | hSUA/sCR_hTG | n=101  | 1.33 [0.83-2.15], p=0.240  | 1.67 [0.95-2.93], p=0.074  |
| Obese, hypertensive and diabetic (n=257) |              |        |                            |                            |
|                                          | ISUA/sCR_nTG | n=54   | 1 (reference)              | 1 (reference)              |
|                                          | hSUA/sCR_nTG | n=93   | 1.43 [0.72-2.84], p=0.304  | 1.82 [0.88-3.77], p=0.109  |
|                                          | ISUA/sCR_hTG | n=31   | 1.30 [0.53-3.19], p=0.562  | 1.44 [0.44-2.95], p=0.789  |
|                                          | hSUA/sCR_hTG | n=79   | 1.24 [0.60-2.59], p=0.561  | 1.39 [0.63-3.07], p=0.441  |

Hazard ratios [95% confidence interval] for SUA/serum creatinine and TG cut-offs in univariable and multivariable analysis for cardiovascular mortality across the cardiometabolic spectrum. Age, sex, BMI, the active consumption of alcohol, the current smoking habit, SBP, DBP, total cholesterol, HDL, glycaemia, hematocrit and diuretics were used as confounders. Data were analysed by Cox regression analysis. The analysis was not performed on people with obesity and type diabetes and no other comorbidities due to the small sample size of the group (n=18). Data are reported for completeness in undersized groups (n<50).  $p < 0.05$  was considered statistically significant  $>100$ : hazard ratio or confidence interval value higher than 100. *lSUA/sCr\_hTG*: low SUA/serum creatinine and hypertriglyceridemia TG. *lSUA/sCr\_nTG*: low SUA/serum creatinine and normotriglyceridemia. *hSUA/sCr\_hTG*: high SUA/serum creatinine and hypertriglyceridemia TG. *hSUA/sCr\_nTG*: high SUA/serum creatinine and normotriglyceridemia. TG: triglycerides. SUA: serum uric acid.

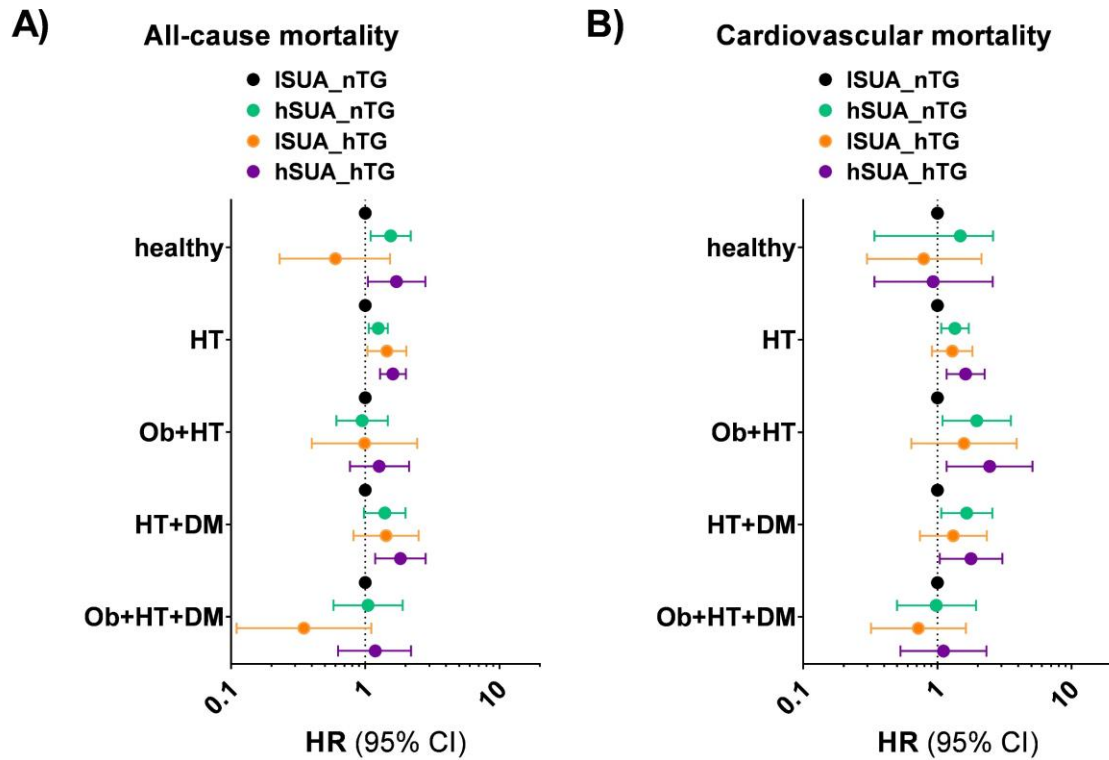

**Supplementary Figure S1.** Trends for all-cause mortality (A) and cardiovascular mortality (B) across cardiometabolic spectrum in patients across combined SUA and TG strata, adopting  $\text{SUA} \geq 4.7$  mg/dL and  $\text{SUA} \geq 5.6$  mg/dL as cut-offs for all-cause mortality and cardiovascular mortality, respectively. Low SUA and normotriglyceridemia TG (black dots and lines); low SUA and hypertriglyceridemia (green dots and lines); high SUA and normotriglyceridemia TG (orange dots and lines); high SUA and hypertriglyceridemia (violet dots and lines). The analysis was not run on people with obesity and type diabetes and no other comorbidities due to the small sample size of the subgroup ( $n=18$ ). Data in undersized groups ( $n < 50$ ) are reported for completeness in Supplementary Tables 3-4. *CI*: confidence interval. *DM*: patients with diabetes and no other comorbidities. *HR*: hazard ratio. *HT*: patients with hypertension and no other comorbidities. *HT+DM*: patients with hypertension and diabetes and no other comorbidities; *hSUA\_hTG*: high SUA and hypertriglyceridemia TG. *hSUA\_nTG*: high SUA and normotriglyceridemia. *ISUA\_hTG*: low SUA and hypertriglyceridemia TG. *ISUA\_nTG*: low SUA and normotriglyceridemia. *Ob*: patients with obesity and no other comorbidities; *Ob+HT*: patients with obesity and hypertension and no other comorbidities; *Ob+HT+DM*: patients with obesity, hypertension and diabetes and no other comorbidities.
